# Supplementary material for: Targeting Mitochondria in Melanoma
Source: PubMed Central journal article supplement (PMC7599575; doi:10.3390/biom10101395), 2020-09-30
Supplement: biomolecules-10-01395-s001.pdf [file biomolecules-10-01395-s001.pdf]

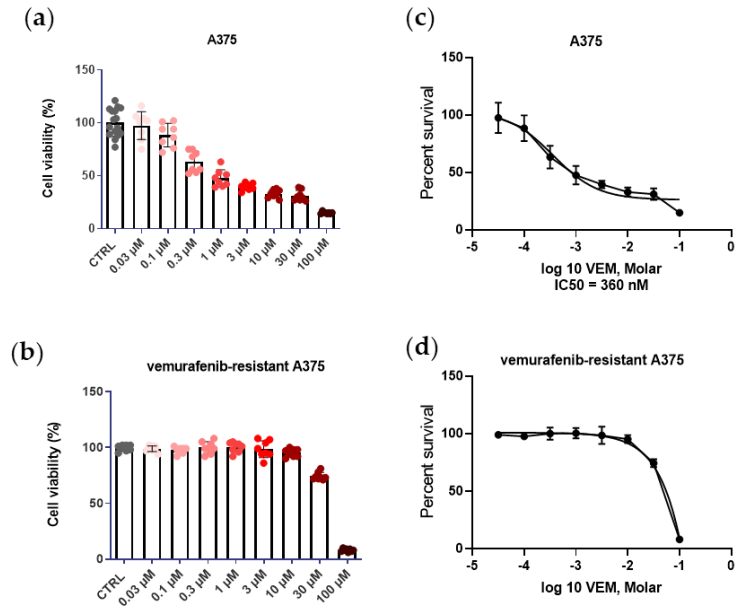

**Supplementary Figure S1.** Effect of vemurafenib on the growth of monolayer cultures of RA375 and A375 cells at the indicated concentrations for 72 hours (a). (b) Dose-response curve to generate IC<sub>50</sub> of vemurafenib in the RA375 and A375 cell lines.

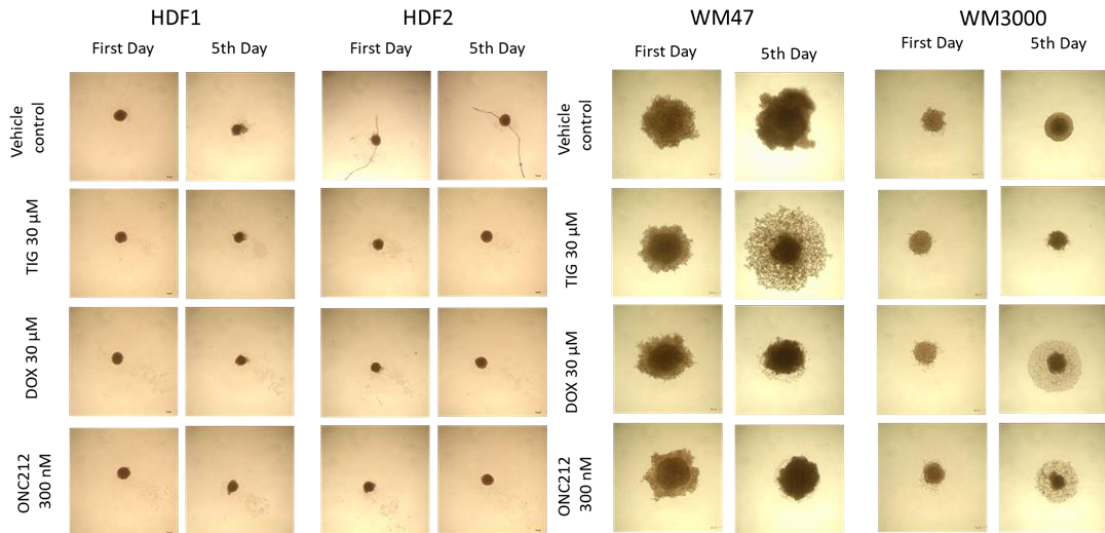

**Supplementary Figure S2.** Volume of HDFs and melanoma spheroids after treatment with TIG, DOX (30 μM) and ONC212 (300 nM). Images were acquired at day 1 and day 5 of treatment. Photos were taken at 100× magnification.
